# Supplementary material for: Prevalence and molecular characterisation of multi-drug resistant ST11 hypervirulent Klebsiella pneumoniae in a teaching hospital
Source: Research Square preprint supplement (doi:10.21203/rs.3.rs-5028260/v1), 2025-05-06
Supplement: Supplementary file 1 [file 596720e924342dae9f54512b.docx]

**Supplementary material**

| Table S1 The virulence gene primer sequences of and amplicon sizes used in the study | | | | | |
| --- | --- | --- | --- | --- | --- |
| virulence factors | Primer (Virulence genes) | Primer sequences（5'to3'） | Amplicon size (bp) | Annealing Temperature(°C) | Reference |
| Aerobactin | iucA-F1 | AATCAATGGCTATTCCCGCTG | 239 | 59 | [1] |
| iucA-R1 | CGCTTCACTTCTTTCACTGACAGG |  |  |
| iucA-F2 | GCTTATTTCTCCCCAACCC | 583 | 59 |
| iucA-R2 | TCAGCCCTTTAGCGACAAG |  |  |
| iutA-F | AATCACCTGGGGGCTGGATGCT | 683 | 60 | [2] |
| iutA-R | CCGCACCTTCCACGCCGTAAAT |  |  |
| Ent siderophore | fepA-F | CGACGTCTCGGAGATCATT | 554 | 50 | [3] |
| fepA-R | GATATCAATCTGGCGGTTGTT |  |  |
| entB-F | TGAAGACGATACCGTGCTGGTGGA | 371 | 50 |
| entB-R | GTCGGCGACAAAGAACGGTTTGAT |  |  |
| Salmochelin | iroB-F1 | ATCTCATCATCTACCCTCCGCTC | 235 | 59 | [1] |
| iroB-R1 | GGTTCGCCGTCGTTTTCAA |  |  |
| iroB-F2 | CAAAAAAGCAGCAGAGGC | 585 | 59 |
| iroB-R2 | TCACTGGCGGAATCCAACAC |  |  |
| iroN-F | CCGCAAAGAGACGAACCGCCTT | 546 | 60 | [2] |
| iroN-R | CGGGCAATCCCCGCTTTGACTT |  |  |
| Yersiniabactin | ybtS-F | CAAAAATGGGCGGTGGATTC | 242 | 50 | [3] |
| ybtSR | CCTGACGGAACATAAACGAGCG |  |  |
| Type 3 fimbriae | mrkD-F | CCACCAACTATTCCCTCGAA | 226 | 43 | [4] |
| mrkD-R | ATGGAACCCACATCGACATT |  |  |
| Type I fimbriae | fimH-F | GCCAACGTCTACGTTAACCTG | 180 | 43 |
| fimH-R | ATATTTCACGGTGCCTGAAAA |  |  |
| Regulation | prmpA-F | GAGTAGTTAATAAATCAATAGCAAT | 332 | 50 | [1] |
| prmpA-R | CAGTAGGCATTGCAGCA |  |  |
| prmpA2-F | GTGCAATAAGGATGTTACATTA | 430 | 50 |
| prmpA2-R | GGATGCCCTCCTCCTG |  |  |
| Capsule | K1-F | GTAGGTATTGCAAGCCATGC | 1283 | 56 | [5] |
| K1-R | GCCCAGGTTAATGAATCCGT |  |  |
| K2-F | GGAGCCATTTGAATTCGGTG | 641 | 56 |
| K2-R | TCCCTAGCACTGGCTTAAGT |  |  |
| K5-F | GCCACCTCTAAGCATATAGC | 280 | 56 |
| K5-R | CGCACCAGTAATTCCAACAG |  |  |
| K20-F | CCGATTCGGTCAACTAGCTT | 741 | 56 |
| K20-R | GCACCTCTATGAACTTTCAG |  |  |
| K54-F | CATTAGCTCAGTGGTTGGCT | 881 | 56 |
| K54-R | GCTTGACAAACACCATAGCAG |  |  |
| K57-F | CGACAAATCTCTCCTGACGA | 1037 | 56 |
| K57-R | CGCGACAAACATAACACTCG |  |  |
| K64-F | TCAGTTCCGACCCTGATGCAGGTA | 268 | 60 | [2] |
| K64-R | GCCAGAGCAACTATCATCCAAAGCCA |  |  |
| K47-F | GGACGCACAGTTTCCCAATTCGC | 392 | 60 |
| K47-R | GCCCACATGAACCCACTTGGCA |  |  |

Table S2 The primer genes sequences mediating CR-HVKP resistance to carbapenems, cephalosporins, quinolones, aminoglycosides and sulphonamides and amplicon sizes used in the study

| Antimicrobials | Primer | Primer sequences（5'to3'） | Amplicon size (bp) | Annealing Temperature (°C) | Reference |
| --- | --- | --- | --- | --- | --- |
| Carbapenem | KPC | TGTCACTGTATCGCCGTC | 900 | 60 | [6] |
|  | CTCAGTGCTCTACAGAAAACC |  |  |
| GES | GTTTTGCAATGTGCTCAACG | 371 | 57 | [7] |
|  | TGCCATAGCAATAGGCGTAG |  |  |
| NDM | GCAGCTTGTCGGCCATGCGGGC | 782 | 60 | [6] |
|  | GGTCGCGAAGCTGAGCACCGCAT |  |  |
| VIM | GTTTGGTCGCATATCGCAAC | 389 | 60 |
|  | AATGCGCAGCACCAGGATAG |  |  |
| IMP | GAAGGCGTTTATGTTCATAC | 587 | 60 |
|  | GTACGTTTCAAGAGTGATGC |  |  |
| OXA-48 | GCGTGGTTAAGGATGAACAC | 438 | 60 |
|  | CATCAAGTTCAACCCAACCG |  |  |
| SPM | AAAATCTGGGTACGCAAACG | 271 | 52 | [8] |
|  | ACATTATCCGCTGGAACAGG |  |  |
| ESBL | SHV | AGCCGCTTGAGCAAATTAAAC | 713 | 60 | [9] |
|  | ATCCCGCAGATAAATCACCAC |  |  |
| TEM | CATTTCCGTGTCGCCCTTATTC | 800 | 60 |
|  | CGTTCATCCATAGTTGCCTGAC |  |  |
| CTX-M1 | TTAGGAARTGTGCCGCTGYA | 688 | 60 |
|  | CGATATCGTTGGTGGTRCCAT |  |  |
| CTX-M2 | CGTTAACGGCACGATGAC | 404 | 60 |
|  | CGATATCGTTGGTGGTRCCAT |  |  |
| CTX-M8 | AACRCRCAGACGCTCTAC | 326 | 60 |
|  | TCGAGCCGGAASGTGTYAT |  |  |
| CTX-M9 | TCAAGCCTGCCGATCTGGT | 561 | 60 |
|  | TGATTCTCGCCGCTGAAG |  |  |
| Aminoglycoside | aac(3')-II | ATATCGCGATGCATACGCGG | 877 | 55 | [10] |
|  | GACGGCCTCTAACCGGAAGG |  |  |
| aac(6')-Ib | TTGCGATGCTCTATGAGTGGCTA | 472 | 55 |
|  | CTCGAATGCCTGGCGTGTTT |  |  |
| aac(6')-II | CGACCATTTCATGTCC | 542 | 55 |
|  | GAAGGCTTGTCGTGTTT |  |  |
| ant(3'')-I | CATCATGAGGGAAGCGGTG | 787 | 55 |
|  | GACTACCTTGGTGATCTCG |  |  |
| aph(3')-VI | ATGGAATTGCCCAATATTATT | 780 | 55 |
|  | TCAATTCAATTCATCAAGTTT |  |  |
| armA | CCGAAATGACAGTTCCTATC | 846 | 55 |
|  | GAAAATGAGTGCCTTGGAGG |  |  |
| rmtB | ATGAACATCAACGATGCCCTC | 769 | 60 |
|  | CCTTCTGATTGGCTTATCCA |  |  |
| Quinolone | QnrA | AGAGGATTTCTCACGCCAGG | 619 | 57 | [11] |
|  | GCAGCACTATKACTCCCAAGG |  |  |
| QnrB | GGMATHGAAATTCGCCACTG | 264 | 57 |
|  | TTTGCYGYYCGCCAGTCGAA |  |  |
| QnrC | GGGTTGTACATTTATTGAATC | 447 | 57 |
|  | TCCACTTTACGAGGTTCT |  |  |
| QnrD | CGAGATCAATTTACGGGGAATA | 582 | 57 |
|  | AACAAGCTGAAGCGCCTG |  |  |
| QnrS | GCAAGTTCATTGAACAGGGT | 428 | 56 |
|  | TCTAAACCGTCGAGTTCGGCG |  |  |
| Qep | CTGCAGGTACTGCGTCATG | 403 | 60 |
|  | CGTGTTGCTGGAGTTCTTC |  |  |
| AAC(6')-Ib-cr | TTGCGATGCTCTATGAGTGGCTA | 482 | 56 |
|  | CTCGAATGCCTGGCGTGTTT |  |  |
| OqxA | CTCGGCGCGATGATGCT | 392 | 60 | [12] |
|  | CCACTCTTCACGGGAGACGA |  |  |
| OqxB | TTCTCCCCCGGCGGGAAGTAC | 512 | 58 |
|  | CTCGGCCATTTTGGCGCGTA |  |  |
| Sulfonamide | sul1 | TTCGGCATTCTGAATCTCAC | 822 | 55 | [13] |
|  | ATGATCTAACCCTCGGTCTC |  |  |
| sul2 | CGGCATCGTCAACATAACC | 722 | 55 |
|  | GTGTGCGGATGAAGTCAG |  |  |

| **Table S 3 Gene loci included in the Klebsiella pneumoniae MLST scheme, PCR and sequencing primers** | | | | |  |
| --- | --- | --- | --- | --- | --- |
| Klebsiella pneumoniae | Target gene | Primer sequence | Amplicon size(bp) | Annealing temperature(℃) | Reference |
| Beta-subunit of RNA polymerase B | rpoB | GGCGAAATGGCWGAGAACCA | 501 | 50 | [14] |
|  |  | GAGTCTTCGAAGTTGTAACC |  |  |
| Glyceraldehyde 3-phosphate dehydrogenase | gapA | TGAAATATGACTCCACTCACGG | 450 | 60 |
|  |  | CTTCAGAAGCGGCTTTGATGGCTT |  |  |
| Malate dehydrogenase | mdh | CCCAACTCGCTTCAGGTTCAG | 477 | 50 |
|  |  | CCGTTTTTCCCCAGCAGCAG |  |  |
| Phosphoglucose isomerase | pgi | GAGAAAAACCTGCCTGTACTGCTGGC | 432 | 50 |
|  |  | CGCGCCACGCTTTATAGCGGTTAAT |  |  |
|  | pgi2F(seq) | CTGCTGGCGCTGATCGGCAT |  |  |
|  | pgi2R(seq) | TTATAGCGGTTAATCAGGCCGT |  |  |
| Phosphoporine E | phoE | ACCTACCGCAACACCGACTTCTTCGG | 420 | 50 |
|  |  | TGATCAGAACTGGTAGGTGAT |  |  |
| Translation initiation factor 2 | infB | CTCGCTGCTGGACTATATTCG | 318 | 50 |
|  |  | CGCTTTCAGCTCAAGAACTTC |  |  |
|  | infB2F(seq) | ACTAAGGTTGCCTCCGGCGAAGC |  |  |
| Periplasmic energy transducer | tonB | CTTTATACCTCGGTACATCAGGTT | 414 | 45 |
|  |  | ATTCGCCGGCTGRGCRGAGAG |  |  |

**Reference**

1. Russo TA, Olson R, Fang CT, Stoesser N, Miller M, MacDonald U, Hutson A, Barker JH, La Hoz RM, Johnson JR: Identification of Biomarkers for Differentiation of Hypervirulent Klebsiella pneumoniae from Classical K. pneumoniae. *J Clin Microbiol* 2018, 56(9).

2. Yu F, Lv J, Niu S, Du H, Tang YW, Pitout JDD, Bonomo RA, Kreiswirth BN, Chen L: Multiplex PCR Analysis for Rapid Detection of Klebsiella pneumoniae Carbapenem-Resistant (Sequence Type 258 [ST258] and ST11) and Hypervirulent (ST23, ST65, ST86, and ST375) Strains. *J Clin Microbiol* 2018, 56(9).

3. Tsuka T, Kumashiro S, Kihara T, Iida T: Correlation between Polymerase Chain Reaction Identification of Iron Acquisition Genes and an Iron-Deficient Incubation Test for Klebsiella pneumoniae Isolates from Bovine Mastitis. *Microorganisms* 2022, 10(6).

4. Wasfi R, Elkhatib WF, Ashour HM: Molecular typing and virulence analysis of multidrug resistant Klebsiella pneumoniae clinical isolates recovered from Egyptian hospitals. *Sci Rep* 2016, 6:38929.

5. Fang CT, Lai SY, Yi WC, Hsueh PR, Liu KL, Chang SC: Klebsiella pneumoniae genotype K1: an emerging pathogen that causes septic ocular or central nervous system complications from pyogenic liver abscess. *Clin Infect Dis* 2007, 45(3):284-293.

6. Doyle D, Peirano G, Lascols C, Lloyd T, Church DL, Pitout JD: Laboratory detection of Enterobacteriaceae that produce carbapenemases. *J Clin Microbiol* 2012, 50(12):3877-3880.

7. Weldhagen GF, Prinsloo A: Molecular detection of GES-2 extended spectrum Beta-lactamase producing Pseudomonas aeruginosa in Pretoria, South Africa. *Int J Antimicrob Agents* 2004, 24(1):35-38.

8. Ellington MJ, Kistler J, Livermore DM, Woodford N: Multiplex PCR for rapid detection of genes encoding acquired metallo-beta-lactamases. *J Antimicrob Chemother* 2007, 59(2):321-322.

9. Dallenne C, Da Costa A, Decre D, Favier C, Arlet G: Development of a set of multiplex PCR assays for the detection of genes encoding important beta-lactamases in Enterobacteriaceae. *J Antimicrob Chemother* 2010, 65(3):490-495.

10. Hu X, Xu B, Yang Y, Liu D, Yang M, Wang J, Shen H, Zhou X, Ma X: A high throughput multiplex PCR assay for simultaneous detection of seven aminoglycoside-resistance genes in Enterobacteriaceae. *BMC Microbiol* 2013, 13:58.

11. Chen X, Zhang W, Pan W, Yin J, Pan Z, Gao S, Jiao X: Prevalence of qnr, aac(6')-Ib-cr, qepA, and oqxAB in Escherichia coli isolates from humans, animals, and the environment. *Antimicrob Agents Chemother* 2012, 56(6):3423-3427.

12. Kim HB, Wang M, Park CH, Kim EC, Jacoby GA, Hooper DC: oqxAB encoding a multidrug efflux pump in human clinical isolates of Enterobacteriaceae. *Antimicrob Agents Chemother* 2009, 53(8):3582-3584.

13. Chaturvedi P, Singh A, Chowdhary P, Pandey A, Gupta P: Occurrence of emerging sulfonamide resistance (sul1 and sul2) associated with mobile integrons-integrase (intI1 and intI2) in riverine systems. *Sci Total Environ* 2021, 751:142217.

14. Diancourt L, Passet V, Verhoef J, Grimont PA, Brisse S: Multilocus sequence typing of Klebsiella pneumoniae nosocomial isolates. *J Clin Microbiol* 2005, 43(8):4178-4182.
