# Supplementary material for: Prevalence and molecular characterisation of multi-drug resistant ST11 hypervirulent Klebsiella pneumoniae in a teaching hospital
Source: Research Square preprint supplement (doi:10.21203/rs.3.rs-5028260/v1), 2025-05-06
Supplement: Supplementary file 2 [file 630daccf0bff8f3357f87851.docx]

DNA sequencing data in the manuscript

*ybtS*:

ATGAAAATCAGTGAATTTCTACATCTGGCGTTACCAGAGGAACAATGGCTACCGACGATTTCTGGCGTTTTACGCCAGTTCGCAGAAGAAGAGTGTTATGTCTATGAGCGTCAACCCTGTTGGTATTTAGGCAAAGGGTGCCAGGCACGGCTGCACATTAATGCCGACGGAACGCAGGCGACATTTATTGATGATGCCGGGGAGCAAAAATGGGCGGTGGATTCCATTGCCGACTGCGCGCGTCGTTTTATGGCGCATCCTCAGGTGAAAGGACGTCGGGTATATGGACAGGTTGGGTTCAACTTTGCGGCGCATGCGCGGGGGATTGCCTTTAACGCCGGGGAGTGGCCGCTGCTGACGTTAACCGTTCCCCGTGAAGAACTTATTTTTGAAAAGGGAAATGTCACCGTTTATGCGGACTCCGCCGACGGGTGCCGACGTTTGTGCGAGTGGGTAAAAGAGGCCGGTACAACGACGCAGAACGCACCACTGGCGGTGGATACCGCCCTCAATGGTGAGGCATATAAACAACAGGTTGCGCGCGCCGTTGCGGAGATCCGCCGTGGCGAGTATGTCAAAGTGATTGTCTCGCGCGCCATTCCCCTGCCATCGCAGATTGATATGCCCGCCACGCTGTTATACGGGCGGCAGGCGAACACACCTGTGCGCTCGTTTATGTTCCGTCAGGAAGGACGCGAAGCGCTGGGCTTTAGCCCGGAACTGGTGATGTCAGTGACGGGCAATAAAGTGGTCACTGAACCGCTTGCGGGCACCCGCGATCGCATGGGAAACCCGGAGCATAATAAGGCGAAAGAGGCAGAACTGTTGCACGACAGTAAAGAGGTGCTTGAGCATATCCTTTCTGTCAAAGAAGCTATTGCTGAACTGGAGGCCGTTTGCCAGCCGGGCAGCGTGGTGGTTGAAGATTTAATGTCGGTTCGCCAGCGCGGCAGCGTTCAGCATCTGGGGTCTGGCGTGAGCGGTCAGCTTGCGGAAAACAAGGATGCCTGGGATGCGTTTACCGTGCTGTTTCCGTCGATTACCGCCTCAGGTATCCCTAAAAATGCTGCTCTGAACGCGATTATGCAAATTGAGAAGACGCCGCGAGAGCTTTATTCCGGCGCAATCCTGCTGCTGGACGATACGCGCTTTGATGCGGCGCTAGTTCTGCGTTCCGTATTTCAGGATAGCCAGCGCTGCTGGATACAGGCGGGGGCGGGAATCATCGCGCAATCTACGCCGGAACGCGAACTGACAGAAACCCGGGAGAAATTAGCGAGCATTGCGCCCTATTTAATGGTGTAG

*mrkD*:

ATGTCGCTGAGGAAATTACTAACGCTTTTTATCGTCTTAATGGCGCTGGGAACCACCTCGTCCTGGGCCTCCTGTACGCGTCTCTCATCGCCAACGGTGATGCTGGACATGGTGGTGGGCAGGGTGGTGGTGCCCCCGGATCTGCCGGTGGGCTCGGTGATCCTTACCCGCGACTGGACGATGAGCGCTCCCGGCGGGGCAAGCTATCGCTGTACTTCCGGCACCAACCGCTTTGCGGCGAAGATCGTGTCGCCAGGGGCCACGGACCTTGGAAATAAAATCTACTCCACCAACGTGCCGGGAATCGGCATGCGTTTCAGCCGCGGCGGCGCAACGGTAAATATCGTCTATCCCGACGTCTTTTCGTCCCGGGTATATAACACCACCAACTATTCCCTCGAAGGGTCGCGCTTTACGCTGGAGATTATCAAAACCGCGGCAACCACCGGCAGCGGCACCCTGGCGGCGGGTAAGTACACCTCCTACGACTGGGAGAGCGGCGGTAACCCGATCCTCGAAACCTATCTGAGCGCCAACGCCATCACCGTGGTCTCGCCCTCCTGTTCGGTGCTGAGCGGGAAAAATATGAATGTCGATGTGGGTTCCATCCGGCGCACCGACCTGAAAGGGGTCGGCACCACCGCCGGCGGGAAGGATTTTAATATCGACCTGCAGTGCAGCGGCGGCCTGAGTGAAACGGGATATGCCAACATTAGCACCTCGTTCTCCGGTACCCTGGCCACCAGCACTACCGCTACCATGGGCGCCTTGCTGAATGAAAAAGCCGGCAGCGGGATGGCGAAAGGCATTGGCATCCAGGTGCTGAAGGATGGCTCCCCGCTGCAGTTTAATAAGAAATACACCGTCGGCCGCTTGAATAATCAGGAGACCCGCTACATCACCATACCGCTGCACGCGCGTTTTTATCAGTATGGCCCGACGACCAGCACCGGCGAGGTGGAGTCGCATATGATCTTTAACCTGACGTACGATTAA

*fimH*:

ATGAAAAAAATAATCCCCCTGTTCACCACCCTGCTGCTGCTGGGCTGGTCGATGAACGCCTGGTCCTTTGCCTGCAAAACGGCCACCGGGGCGACGATTCCCATCGGCGGCGGGTCAGCCAACGTCTACGTTAACCTGACCCCGGCGGTGAACGTCGGGCAAAACCTGGTGGTCGACCTCTCCACGCAGATTTTTTGCCATAACGACTATCCGGAAACGATCACCGACTACGTGACCCTGCAGCGCGGATCCGCCTATGGCGGTGTGCTGTCGAGTTTTTCAGGCACCGTGAAATATAACGGCACCTCTTACCCGTTCCCGACCACCACGGAAACCGCGCGGGTGATTTATGATTCACGGACCGATAAACCCTGGCCAGCCGTCCTGTATCTGACGCCGGTGAGCACTGCCGGTGGAGTGGCCATCACCGCAGGATCGTTAATCGCGGTGCTGATCCTGCATCAGACCAACAACTACAATAGCGACTCCTTCCATTTCATCTGGAACATCTACGCCAATAACGACGTGGTGGTCCCCACCGGCGGCTGCGACGTCTCCGCCCGCGATGTCACCGTCACCCTCCCCGACTACCCGGGATCGATGGCCGTGCCGCTCACCGTCCACTGCGCGCAGAGCCAGCAGCTGGGGTATTACCTCTCCGGCACCACCGCGGACAGCGCCAACGCGATCTTCACCAATACCGCCTCCGCCTCGCCGGCGCAGGGGATAGGCGTTCAGCTGACGCGCAACGGCAGCGCCGTCCCGGCGAACAGCACGGTCTCGCTGGGCACCGTCGGCACCTCGCCGGTCAACCTCGGCCTGACGGCCACCTATGCCCGGACCACAGGCCAGGTTACCGCCGGCAACGTGCAGTCGATCATCGGCATCACCTTTGTCTATCAATGA

*iucA*:

ATGACTTTGCCAACTAAAACCTCAACCTTGGATGTGGCTGCGCAGTGCTTCCTTAATTCCTTGGTTCGTGAAACCAAAGACTGGCGGCTGACGGAATACCAGCCAACCCAATTGATCATCCCGCTGGGCGAACAGCAGGCGCTCCATTTCAGAGTGGCTTATTTCTCCCCAACCCAGCATCACCGCTTTGAATTTCCGGCGCGTCTGGTCACGGCCTCCGGCAGTCACCCCGTCGATTTCGCCACCCTCTCCCGGCTTATTGTTGATAAGCTCCAGCACCAACTCTTGCTACCCGCGACCAGTTGCGAAACCTTCCACCAGCGCGTGATGGAAAGCCACGCCCATACGCAGCAGGCAATTGATGCCCGCCATGACTGGGCAGCCCTGCGTGAAAAAGCGTTGAACTTTGGCGAGGCGGAGCAGGCTCTGCTGGTCGGGCACGCCTTCCACCCGGCGCCTAAGTCTCATGAACCGTTTAACCAGCAGGAGGCCGAACGCTACCTGCCGGACTTCGCGCCCCACTTCCCGCTGCGGTGGTTTGCGGTGAACAAAACGCAGATCGCCGGTGAAAGCCTGCATCTCAACCTGCAACAACGGTTGACGCGATTTGCCGCAGAGAATGCGCCGCAGTTACTCAATGAATTAAGCGACAATCAATGGCTATTCCCGCTGCACCCGTGGCAGGGGGAGTATCTGTTGCAGCAGGAATGGTGCCAGGAGCTTGTCGCTAAAGGGCTGATTAAAGATTTAGGCGAGGCCGGCGCGCCGTGGCTACCGACCACCTCTTCCCGCTCGCTATACTGCGCCACCAGCCGCGACATGATCAAATTCTCCCTGAGCGTGCGCCTGACCAACTCCGTCCGTACCCTGTCAGTGAAAGAAGTGAAGCGTGGAATGCGCCTGGCGCGCCTGGCGCAAACCGACGACTGGCAGACGCTACAGGCCCGCTTCCCGACTTTCCGGGTGATGCAGGAAGACGGTTGGGCCGGGCTGCGCGATCTCCACGGCAACATCATGCAGGAAAGCCTGTTTGCCCTGCGTGAAAACCTGCTGGTGGATCAGCCGCAAAGCCAGACTAACGTACTGGTCTCCCTGACCCAGGCCGCGCCGGATGGCGGTGATTCGCTGCTGGTTGCGGCGGTAAAACGCCTGAGCGATCGCCTCGGCATCACTGCGCAACAGGCCGCCCACGCATGGGTCGATGCTTACTGCCATCAGGTGCTGAAGCCGCTGTTTACGGCTGAAGCGGATTACGGCCTGGTGCTGCTGGCGCATCAGCAAAATATTCTGGTTCAGATGCTTGGGGATCTGCCGGTCGGGCTTATCTACCGTGACTGCCAGGGCAGCGCGTTTATGCCTCACGCGGCAGGCTGGCTCGACACCATTGGCGAGGCGCAGGCGGAAAACGTCTTCACCCGTGAGCAGTTGCTGCGCTACTTCCCTTATTACCTGCTGGTTAACTCCACTTTTGCCGTGACCGCCGCGCTGGGCGCTGCCGGGCTGGACAGTGAAGCGAATCTGATGGCTCGCGTACGAACGTTGCTGGCTGAAATGCGTGATCAGGTGACTCATAAAACCTGTCTCAACTACGTGCTGGAAAATCCGTACTGGAACGTAAAAGGTAACTTTTTCTGTTATCTGAACGACCACAACGAGAACACCATCGTCGATCCCTCGGTGATCTACTTCGATTTCGCCAACCCGCTGCTGGCTCAGGAGGGTTAA

*entB*:

ATGGCTATTCCAAAATTACAGGCTTACGCACTGCCGGAGTCTCACGATATTCCGCAGAATAAAGTCGACTGGGCCTTTGAACCGCAACGTGCCGCGTTGTTAATCCATGATATGCAGGACTATTTTGTCAGCTTCTGGGGTGAGAACTGCCCGATGATGGAGCAGGTGATCGCGAATATTGCGGCACTACGCGACTACTGCAAACAGCACAATATCCCGGTTTATTACACCGCCCAGCCGAAAGAGCAGAGCGATGAAGATCGGGCGCTGTTGAATGATATGTGGGGGCCTGGCCTGACCCGTTCGCCGGAACAGCAAAAGGTGGTGGATCGCCTGACGCCAGATGCCGACGACACGGTGCTGGTGAAATGGCGCTACAGCGCGTTTCATCGTTCCCCGCTGGAGCAAATGCTCAAAGAGAGTGGACGTAACCAGCTGATTATTACCGGGGTATATGCCCACATTGGCTGTATGACCACCGCAACGGACGCATTTATGCGCGATATTAAACCGTTTATGGTGGCGGATGCGCTGGCCGATTTCAGCCGTGACGAGCATTTGATGTCGCTGAAATATGTGGCCGGACGTTCTGGTCGGGTGGTGATGACCGAAGAATTGCTGCCAGCACCTATCCCCGCCAGCAAAGCGGAGCTGCGTGAGGTGATCCTGCCGTTGCTGGACGAGTCCGATGAACCCTTCGATGACGACAACCTGATCGACTACGGTCTGGATTCGGTGCGCATGATGGCGCTGGCGGCGCGCTGGCGCAAAGTGCATGGTGATATCGACTTTGTCATGCTGGCGAAAAACCCGACCATCGACGCCTGGTGGAAGCTACTCTCCCGCGAGGTGAAATAA

*iutA*:

ATGCGCAAAAAGTATATGCCCCGGGCTCTTGGTCCGCTGCTTCTTGTCGTGCTGTCACCAGCTGTCGCCCAGCAAAACGATGATAATGAGATCATAGTGTCTGCCAGCCGCAGCAATCGAACTGTAGCGGAGATGGCGCAAACCACCTGGGTTATCGAAAATGCCGAACTGGAGCAGCAGATTCAGGGCGGTAAAGAGCTGAAAGACGCACTGGCTCAGTTAATCCCCGGCCTTGATGTCAGCAGCCAGAGCCGAACCAACTACGGTATGAACATGCGTGGCCGCCCGCTGGTTGTCCTGATTGACGGTGTGCGCCTCAACTCTTCACGTTCCGACAGCCGACAACTGGACTCTGTCGATCCTTTTAATATCGACCATATTGAAGTGATCTCCGGCGCGACGGCCCTGTACGGTGGCGGGAGTACCGGAGGGTTGATCAACATCGTGACCAAAAAAGGCCAGCCGGAAACCATGATGGAGTTTGAGGCTGGCACAAAAAGTGGCTTTAACAGCAGTAAAGATCACGATGAGCGCATTGCCGGTGCTGTCTCCGGCGGAAATGACCATATCTCCGGACGTCTTTCCGTGGCATATCAGAAATTTGGCGGCTGGTTTGACGGTAACGGCGATGCCACCCTGCTTGATAACACCCAGACCGGC

CTGCAGCACTCCAATCGGCTGGACATCATGGGAACCGGTACGCTGAACATCGATGAATCCCGGCAGCTTCAACTGATAACGCAGTACTATAAAAGTCAGGGGGACGACAATTACGGGCTTAATCTCGGGAAAGGCTTTTCCGCCATCAGCGGGAGCAGCACACCATACGTCAGTAAGGGGCTGAATTCTGACCGCATTCCCGGCACTGAGCGGCATTTGATCAGCCTGCAGTACTCTGACAGTGATTTCCTGAGACAGGAACTGGTCGGTCAGGTTTACTACCGCGATGAGTCGTTGCGGTTCTACCCGTTCCCGACGGTAAATGCGAATAAACAGGCGACGGCTTTCTCCTCGTCACAGCAGGATACCGACCAGTACGGCATGAAACTGACTCTGAACAGCCAACTTATGGACGGCTGGCAAATCACCTGGGGGCTGGATGCTGAGCATGAGCGCTTTACCTCCAACCAGATGTTCTTCGATCTGGCTCAGGCAAGTGCTTCCGGAGGGCTGAACAACCATAAGATTTACACCACCGGGCGCTATCCGTCATATGACATCACCAATCTGGCGGCCTTCCTGCAATCCAGCTATGACATTAATGATATTTTTACCGTTAGCGGTGGCGTACGCTATCAGTATACTGAGAACAGGGTAGATGATTTCATCGACTACACGCAGCAACAGAAGATTGCTGCCGGGAAGGCGATATCTGCCGACGCCATTCCTGGTGGTTCGGTAGATTACGATAACTTTCTGTTCAATGCTGGTCTGCTGATGCACATCACCGAACGTCAGCAGGCATGGTTCAATTTTTCCCAGGGGGTGGCATTGCCGGATCCGGGGAAATATTATGGTCGCGGCATCTATGGTGCAGCAGTGAACGGCCATCTTCCCCTGACAAAGAGCGTGAACGTCAGCGACAGTAAGCTGGAAGGCGTGAAAGTCGATTCTTATGAACTGGGCTGGCGCTTTACCGGTGACAACCTGCGGACTCAAATCGCGGCATATTACTCGCTTTCCAATAAGAGCGTGGAAAGGAATAAAGATCTGACCATCAGTGTGAAGGACGACAGGCGCCGTATTTACGGCGTGGAAGGTGCGGTGGACTACCTGATCCCGGATACTGACTGGAGTACCGGTGTGAACTTCAATGTGCTGAAAACCGAGTCGAAAGTGAACGGTCAATGGCAAAAATATGACGTGAAGGAATCAAGTCCATCGAAAGCGACAGCTTACATTAACTGGGCGCCGGAACCGTGGAGTCTGCGTGTACAGAGCACCACTTCTTTCGACGTAAGCGATGCAGAGGGTAACGATATTAATGGTTACACTACCGTCGATTTTATCAGTAGTTGGCAGCTTCCGGTGGGAACACTCAGCTTCAGCGTTGAGAACCTCTTCGACCGTGACTATACCACTGTCTGGGGACAGCGTGCACCTCTGTACTACAGCCCGGGTTACGGCCCTGCTTCACTGTACGACTACAAAGGCCGGGGCCGAACCTTTGGTCTGAACTACTCAGTGCTGTTCTGA

*fepA*:

ATGAATAACAGGATCAAATCCCTGGCCTTGCTGGTCAATCTGGGAATTTACGGGGTTGCTTTTCCGTTAAGCGCAGCGGAAACCGCCACCGACGATAAAAACAGCGCCGCTGAAGAGACCATGGTGGTCACCGCCGCCGAGCAGAACCTGCAGGCGCCGGGCGTCTCCACCATCACCGCCGATGAGATCCGCAAACGCCCCCCGGCGCGCGACGTCTCGGAGATCATTCGCACCATGCCGGGGGTCAACCTGACCGGCAACTCCACCAGCGGCCAGCGCGGCAACAACCGCCAGATTGATATCCGCGGCATGGGCCCGGAAAATACCCTGATCCTGATCGACGGCAAGCCGGTCACCAGCCGCAACTCCGTGCGCCTTGGCTGGCGCGGCGAGCGCGACACCCGCGGCGATACCAGCTGGGTGCCGCCGGAGATGATCGAACGTATCGAAGTGATTCGCGGCCCGGCCGCCGCCCGCTACGGCAACGGCGCCGCCGGCGGCGTGGTGAATATCATCACCAAAAAAACCGGCGATGAGTGGCACGGCTCATGGAACACCTATATGAACGCCCCGGAGCACAAGGATGAAGGCTCCACCAAACGCACTAACTTCAGCCTCAGCGGCCCGCTGGGCGGCGATTTTAGCTTCCGCCTGTTCGGTAACCTCGACAAAACGCAGGCTGACGCCTGGGATATCAACCAGGGCCATCAGTCCGAGCGTACCGGGATCTATGCCGATACTCTGCCGGCCGGGCGCGAAGGGGTGAAAAACAAAAACATCGATGGTCTGGTGCGCTGGGAATTCGCTCCGATGCAGTCGCTGGAGTTTGAGGCCGGCTACAGCCGCCAGGGCAACCTCTACGCCGGCGATACCCAGAACACCAACTCCAACGACCTGGTAAAAGAGAACTACGGCAAAGAGACCAACCGTCTGTATCGCAACACCTACTCGGTTACCTGGAACGGCGCCTGGGACAACGGGGTGACCACCAGCAACTGGGCGCAGTACGAACGCACCCGCAACTCGCGCAAAGGCGAAGGCCTGGCCGGCGGCACCGAGGGGATCTTTAACAGCAACCAGTTCACGGATATCGATCTGGCGGATGTGATGCTGCACAGCGAAGTCAGCATTCCCTTCGACTATCTGGTTAATCAGAACCTGACGCTGGGCAGCGAGTGGAACCAGCAGCGGATGAAGGATAACGCCTCCAATACCCAGGCGCTGTCGGGCGGCAGCATCCCGGGCTACGACAGCACCGGCCGCAGCCCGTACTCGCAGGCGGAAATCTTCTCGCTGTTCGCTGAGAACAACATGGAGCTGACCGACACCACCATGCTGACCCCGGCGCTGCGTTTCGATCATCACAGCATCGTGGGCAATAACTGGAGCCCGTCCCTCAACCTGTCGCAGGGCCTGTGGGATGACTTCACGCTGAAGATGGGCATCGCCCGCGCCTATAAAGCGCCGAGCCTGTATCAGACCAACCCGAACTACATTCTCTACAGTAAAGGCCAGGGCTGCTATGCCAGTAAAGACGGCTGCTATCTGCAGGGTAACGACGACTTAAAAGCCGAGACCAGCATCAACAAAGAGATTGGCCTCGAGTTTAAACGCGACGGCTGGCTGGCTGGCGTCACCTGGTTCCGCAACGACTACCGCAACAAGATTGAAGCGGGCTATGCCCCGGTCTATCAAAACAATAAAGGTACCGATCTCTACCAGTGGGAAAACGTGCCGAAAGCGGTGGTGGAAGGTCTGGAGGGGACGTTGAACGTTCCGGTGAGCGAGACCGTCAACTGGACCAACAACATCACCTATATGCTGCAGAGTAAGAACAAAAAGACCGGCGATCGTCTGTCGATTATCCCGGAATACACGCTGAACTCCACCCTGAGCTGGCAGGTTCGCGATGACGTTTCGCTGCAGTCGACCTTCACCTGGTACGGCAAGCAGGAGCCGAAGAAGTACAACTACAAGGGTCAACCGGTCACCGGCAGCGAGAAGAACGAGGTTAGCCCCTACAGCATCCTCGGCCTGAGCGCGACCTGGGACGTCACCAAATACGTCAGTCTGACCGGCGGCGTGGATAACGTCTTCGATAAGCGCCACTGGCGCGCGGGCAACGCCCAGACCACCGGGGGCGCCACCGGCACGATGTACGGCGCCGGCGCCGAGACCTACAATGAATCGGGCCGCACCTGGTACCTGAGCGTCAACACCCACTTCTGA

*iroN*:

ATGAGAATTAACAAGATCCTCTGGCCGTCAATTGCGCTCTTGGCAGGGTTGAATAGTCAAGTATCAGTAGCCAAATCCTACGACGATAACGACGAGACCTTGGTGGTGGTAGCCACCGCAGAGCAAGTACTAAAACAGCAGCCTGGCGTGTCGATTATTACCAGCGAAGATATTAAAAAGACCCCTCCGGTCAACGACCTCTCCGATATTATTCGCAAAATGCCAGGTGTCAATCTGACCGGCAATAGCGCCTCGGGTACACGCGGTAATAACCGCCAGATCGATATTCGCGGTATGGGGCCGGAAAACACATTAATTTTAATTGATGGTGTACCGGTGACGTCGCGCAACTCCGTGCGTTATAGCTGGCGTGGGGAGCGTGATACCCGCGGCGACACCAACTGGGTGCCACCGGAACAGGTTGAGCGTATCGAAGTGATCCGTGGCCCTGCGGCGGCGCGCTACGGTTCGGGCGCCGCGGGCGGGGTGGTAAACATCATTACCAAACGTCCCTCCAACGACTGGCACGGTTCGCTGTCGCTATACACCAACCAGCCGGAAAGCAGCGATGAAGGCGCTACGCATCGCACCAACTTCAGCCTTAGTGGGCCACTGGCTGGCGATGCGCTGACCATGCACCTCTACGGTAACCTGAATAAAACCGATGCCGACAGCTGGGATATTAACTCCTCAGCCGGTACGAAAAACGCGGCCGGGCATGAAGGGGTGCGCAACAAAGATATTAACGGCGTTGTTTCGTGGAAATTAAATCCGCAGCAAATTCTCGATTTCGAAGCCGGATATAGCCGTCAGGGGAATATTTATGCGGGCGATACGCAAAACAGTTCTTCCAGTGCTGTTACTGAAAACCTAGCGAAATCCCGCAAAGAGACGAACCGCCTTTACCGGCAGAATTATGGCATTGCGCATAATGGTATTTGGGACTGGGGACAAAGTCGTTTTGGTGTTTATTACGAGAAAACCAATAACAACCGCATGAATGAAGGATTATCCGGCGGCAGTGAAGGGCGTATTTTGGCGGATGAAAAATTCACGACCAATCGCCTGAGCTCTTGGCGAACCAGCGGTGAGATTAATATTCCGCTGAATGAACCGGTCGATCAAACGCTAACAGTTGGTGTGGAGTGGAGTCGAGATAAACTCGACGCCCCTTCCTCTACCAGCCTTACGGTGAATGACAGTGATATAGGCGGCATTTCTGGCTCTGCTGCGGATCGCAGCAGTAAAAACCATTCCCAAATCAGTGCGCTGTATATTGATGATAATATTGAGCCGGTTCCCGGCACGAATATCATTTCCGGCTTGCGCTTTGATTATCTCAACGAGTCCGGCGGTAACTTCAGCCCCAGCCTGAACCTATCGCAGGAATTGGGCGATTACTTCAAAGTCAAAGCGGGGATTGCCCGAACCTTCAAAGCACCAAACTTGTATCAATCCAGCAAAGGTTATCTGCTCTACTCGAAAGGCAACGGTTGTCCAAAAGATATTACATCGGGCGGCTGCTACCTGAAAGGAAATAAAGATCTCGATCCGGAAATCAGTATCAATAAAGAAATTGGGCTGGAGTTCGCCTGGGAAGATTACTACGCCAGCGTGACCTACTTCCGCAATGACTACCAGAATAAGATCGTGGCCGGGGATAATGCTATCGGGCAAACCGCTTCAGGCGCATATATCCTCCAGTGGCAGAATGGAGGGAAAGCGCTGGTTGACGGTATCGAAGCCAGCATGGCGTTCCCGCTGGTGAAAGATCGTCTGAACTGGAATACCAATGCCACCTGGATGATCACCTCGGAGCAAAAAGACACCGGTAACCCACTGTCGATCATCCCGAAATATACAATTAATAACTCGCTTGACTGGACCATCACCCAGGCGTTTTCCGCCAGCGTCAACTGGACGTTATACGGCAGACAAAAACCGCGTACCCATGCGGAAAGTCGAAGTGAAGATACTCGCGGCATGTCAGGTAAAGTCTTGGGGGCTTATTCTCTGGTGGGAACGAACTTCAATTACGATATTAATAAAAATCTTCGTCTTAACATCGGTGTCAGTAATATCCTCGATAAGCAGATCTACCGAACTTCAGAAGGTGCTAGTACCTATAATGAGCCAGGGCGGGCTTATTATGTGGGGGCGGTAGTTTCATTCTGA

*prmpA*:

ATGGAAAAATATATTTACTTTATATGTAATAGAGATATAAATATCATATTGACTGATGATTATTTTTTTTATTATGGTCTAAAGCAGTTAACTGGACTACCTCTGTTTCATATTACATTTGAAGGAGTAATTAATAAATCAATAGTTATTAAGCACAAAAAAAACATAAGAGTATTGGTTGACTGCAGGATTTTTTATTCAGGAAAATGGAGAGGGTACAAAATGTTAAGGAAATCATTAAATATGATAAGCCAATGGATATGGCTTGATGTTTCGGGGGGGGGGCGGTTTTACCCTAAAGGGTGTGATTATGACATCTATGTTAACATGCAAGGAAATGTAAAAAAAAATATTGAAAAACTATATTTTGCATTCTTAAAGAAAAATGTTAGCCGAATTGTAAACCATTATCCACGGCTAACAAAAAAAGAACAAATAGTACTGCAATGCTTACTGAAAAGTAAGGGGGGGGATGAAATAAAAAATCAGCTAAAAATTGAAGAAAAAACACTATCATGCTACCGAAGCAAGATAACAAGAAAATTTGGCTGTAAAGGGTACATAAGGTTTATGTATCTTTACAGTCTTAATAAAGAAATGGTTGATGAAAGATGTCTCATGCCAGGTATTTAG

*blaKPC-2*:

ATGTCACTGTATCGCCGTCTAGTTCTGCTGTCTTGTCTCTCATGGCCGCTGGCTGGCTTTTCTGCCACCGCGCTGACCAACCTCGTCGCGGAACCATTCGCTAAACTCGAACAGGACTTTGGCGGCTCCATCGGTGTGTACGCGATGGATACCGGCTCAGGCGCAACTGTAAGTTACCGCGCTGAGGAGCGCTTCCCACTGTGCAGCTCATTCAAGGGCTTTCTTGCTGCCGCTGTGCTGGCTCGCAGCCAGCAGCAGGCCGGCTTGCTGGACACACCCATCCGTTACGGCAAAAATGCGCTGGTTCCGTGGTCACCCATCTCGGAAAAATATCTGACAACAGGCATGACGGTGGCGGAGCTGTCCGCGGCCGCCGTGCAATACAGTGATAACGCCGCCGCCAATTTGTTGCTGAAGGAGTTGGGCGGCCCGGCCGGGCTGACGGCCTTCATGCGCTCTATCGGCGATACCACGTTCCGTCTGGACCGCTGGGAGCTGGAGCTGAACTCCGCCATCCCAGGCGATGCGCGCGATACCTCATCGCCGCGCGCCGTGACGGAAAGCTTACAAAAACTGACACTGGGCTCTGCACTGGCTGCGCCGCAGCGGCAGCAGTTTGTTGATTGGCTAAAGGGAAACACGACCGGCAACCACCGCATCCGCGCGGCGGTGCCGGCAGACTGGGCAGTCGGAGACAAAACCGGAACCTGCGGAGTGTATGGCACGGCAAATGACTATGCCGTCGTCTGGCCCACTGGGCGCGCACCTATTGTGTTGGCCGTCTACACCCGGGCGCCTAACAAGGATGACAAGCACAGCGAGGCCGTCATCGCCGCTGCGGCTAGACTCGCGCTCGAGGGATTGGGCGTCAACGGGCAGTAA

*blaVIM-26*:

CGTGGGTCGATGTTTGATGTTATGGAGCAGCAACGATGTTACGCAGCAGGGCAGTCGCCCTAAAACAAAGTTATGCCGCACCCACCCCTATGGAGTCTTGATGTTAAAAGTTATTAGTAGTTTATTGGTCTACATGACCGCGTCTGTCATGGCTGTCGCAAGTCCGTTAGCCCATTCCGGGGAGCCGAGTGGTGAGTATCCGACAGTCAACGAAATTCCGGTCGGAGAGGTCCGACTTTACCAGATTGCCGATGGTGTTTGGTCGCATATCGCAACGCAGTCGTTTGATGGCGCGGTCTACCCGTCCAATGGTCTCATTGTCCGTGATGGTGATGAGTTGCTTTTGATTGATACAGCGTGGGGTGCGAAAAACACAGCGGCACTTCTCGCGGAGATTGAAAAGCAAATTGGACTTCCCGTAACGCGTGCAGTCTCCACGCACTTTCATGACGACCGCGTCGGCGGCGTTGATGTCCTTCGGGCGGCTGGGGTGGCAACGTACGCATCACCGTCGACACGCCGGCTAGCCGAGGCAGAGGGGAACGAGATTCCCACGCATTCTCTAGAAGGACTCTCATCGAGCGGGGACGCAGTGCGCTTCGGTCCAGTAGAGCTCTTCTATCCTGGTGCTGCGCATTCGACCGACAATCTGGTTGTATACGTCCCGTCAGCGAACGTGCTATACGGTGGTTGTGCCGTTCTTGAGTTGTCAAGCACGTCTGCGGGGAACGTGGCCGATGCCGATCTGGCTGAATGGCCCACCTCCGTTGAGCGGATTCAAAAACACTACCCGGAAGCAGAGGTCGTCATTCCCGGGCACGGTCTACCGGGCGGTCTAGACTTGCTCCAGCACACAGCGAACGTTGTCAAAGCACACAAAAATCGCTCAGTCGCCGAGTAGCAGATGCGGCATAACAAATCGTTGGAGCGGGACTTTTGCTACGCAGGCTGCGCCTACTCCGCAAAAGCCCCTCAACTCAGGCGTTAGGCACCAATGGATA

*blaGES*-1:

TTGATGTTATGGAGCAGCAACGATGTTACGCAGCAGGGCAGTCGCCCTAAAACAAAGTTAGACGGGCGTACAAAGATAATTTCCATCTCAAGGGATCACCATGCGCTTCATTCACGCACTATTACTGGCAGGGATCGCTCACTCTGCATATGCGTCGGAAAAATTAACCTTCAAGACCGATCTTGAGAAGCTAGAGCGCGAAAAAGCAGCTCAGATCGGTGTTGCGATCGTCGATCCCCAAGGAGAGATCGTCGCGGGCCACCGAATGGCGCAGCGTTTTGCAATGTGCTCAACGTTCAAGTTTCCGCTAGCCGCGCTGGTCTTTGAAAGAATTGACTCAGGCACCGAGCGGGGGGATCGAAAACTTTCATATGGGCCGGACATGATCGTCGAATGGTCTCCTGCCACGGAGCGGTTTCTAGCATCGGGACACATGACGGTTCTCGAGGCAGCGCAAGCTGCGGTGCAGCTTAGCGACAATGGGGCTACTAACCTCTTACTGAGAGAAATTGGCGGACCTGCTGCAATGACGCAGTATTTTCGTAAAATTGGCGACTCTGTGAGTCGGCTAGACCGGAAAGAGCCGGAGATGGGCGACAACACACCTGGCGACCTCAGAGATACAACTACGCCTATTGCTATGGCACGTACTGTGGCTAAAGTCCTCTATGGCGGCGCACTGACGTCCACTTCGACCCACACCATTGAGAGGTGGCTGATCGGAAACCAAACGGGAGACGCGACACTACGAGCGGGTTTTCCTAAAGATTGGGTTGTTGGAGAGAAAACTGGTACCTGCGCCAACGGGGGCCGGAACGACATTGGTTTTTTTAAAGCCCAGGAGAGAGATTACGCTGTAGCGGTGTATACAACGGCCCCGAAACTATCGGCCGTAGAACGTGACGAATTAGTTGCCTCTGTCGGTCAAGTTATTACACAACTCATCCTGAGCACGGACAAATAGTTGACGCCCGTCTAAAACAAAGTTAGGCATCACAAAGTACAGCATCGTGACCAACAGCAACGATTCCGTCACACTGCGCCTCATGACTGAGCATGACCTT

*blaNDM-1*:

CCAACGGTTTGGCGATCTGGTTTTCCGCCAGCTCGCACCGAATGTCTGGCAGCACACTTCCTATCTCGACATGCCGGGTTTCGGGGCAGTCGCTTCCAACGGTTTGATCGTCAGGGATGGCGGCCGCGTGCTGGTGGTCGATACCGCCTGGACCGATGACCAGACCGCCCAGATCCTCAACTGGATCAAGCAGGAGATCAACCTGCCGGTCGCGCTGGCGGTGGTGACTCACGCGCATCAGGACAAGATGGGCGGTATGGACGCGCTGCATGCGGCGGGGATTGCGACTTATGCCAATGCGTTGTCGAACCAGCTTGCCCCGCAAGAGGGGATGGTTGCGGCGCAACACAGCCTGACTTTCGCCGCCAATGGCTGGGTCGAACCAGCAACCGCGCCCAACTTTGGCCCGCTCAAGGTATTTTACCCCGGCCCCGGCCACACCAGTGACAATATCACCGTTGGGATCGACGGCACCGACATCGCTTTTGGTGGCTGCCTGATCAAGGACAGCAAGGCCAAGTCGCTCGGCAATCTCGGTGATGCCGACACTGAGCACTACGCCGCGTCAGCGCG

*blaTEM-1b*:

ATGAGTATTCAACATTTTCGTGTCGCCCTTATTCCCTTTTTTGCGGCATTTTGCCTTCCTGTTTTTGCTCACCCAGAAACGCTGGTGAAAGTAAAAGATGCTGAAGATCAGTTGGGTGCACGAGTGGGTTACATCGAACTGGATCTCAACAGCGGTAAGATCCTTGAGAGTTTTCGCCCCGAAGAACGTTTTCCAATGATGAGCACTTTTAAAGTTCTGCTATGTGGTGCGGTATTATCCCGTGTTGACGCCGGGCAAGAGCAACTCGGTCGCCGCATACACTATTCTCAGAATGACTTGGTTGAGTACTCACCAGTCACAGAAAAGCATCTTACGGATGGCATGACAGTAAGAGAATTATGCAGTGCTGCCATAACCATGAGTGATAACACTGCTGCCAACTTACTTCTGACAACGATCGGAGGACCGAAGGAGCTAACCGCTTTTTTGCACAACATGGGGGATCATGTAACTCGCCTTGATCGTTGGGAACCGGAGCTGAATGAAGCCATACCAAACGACGAGCGTGACACCACGATGCCTGCAGCAATGGCAACAACGTTGCGCAAACTATTAACTGGCGAACTACTTACTCTAGCTTCCCGGCAACAATTAATAGACTGGATGGAGGCGGATAAAGTTGCAGGACCACTTCTGCGCTCGGCCCTTCCGGCTGGCTGGTTTATTGCTGATAAATCTGGAGCCGGTGAGCGTGGGTCTCGCGGTATCATTGCAGCACTGGGGCCAGATGGTAAGCCCTCCCGTATCGTAGTTATCTACACGACGGGGAGTCAGGCAACTATGGATGAACGAAATAGACAGATCGCTGAGATAGGTGCCTCACTGATTAAGCATTGGTAA

*blaCTX-M9*:

TATATTTAAGAGCCGGCCGCGCTGCTTGGGGTTTCGGAGATGACGATTCGTCGCGATCTGAACAACCACAGTGCGCCCGTCGTTTTGCTCGGCGGCTATATTGTTCTGGAACCACGCAGCGCCAGCCATTACCTGTTAAGCGATCAAAAATCCCGCCTGGTGGAAGAAAAACGCCGGGCGGCAAAACTGGCAGCGACGCTGGTAGAACCCGATCAGACCCTCTTTTTTGACTATGGCACCACCAACGAA

*blaSHV-12*:

ATGCGTTATATTCGCCTGTGTATTATCTCCCTGTTAGCCACCCTGCCGCTGGCGGTACACGCCAGCCCGCAGCCGCTTGAGCAAATTAAACAAAGCGAAAGCCAGCTGTCGGGCCGCGTAGGCATGATAGAAATGGATCTGGCCAGCGGCCGCACGCTGACCGCCTGGCGCGCCGATGAACGCTTTCCCATGATGAGCACCTTTAAAGTAGTGCTCTGCGGCGCAGTGCTGGCGCGGGTGGATGCCGGTGACGAACAGCTGGAGCGAAAGATCCACTATCGCCAGCAGGATCTGGTGGACTACTCGCCGGTCAGCGAAAAACACCTTGCCGACGGCATGACGGTCGGCGAACTCTGCGCCGCCGCCATTACCATGAGCGATAACAGCGCCGCCAATCTGCTGCTGGCCACCGTCGGCGGCCCCGCAGGATTGACTGCCTTTTTGCGCCAGATCGGCGACAACGTCACCCGCCTTGACCGCTGGGAAACGGAACTGAATGAGGCGCTTCCCGGCGACGCCCGCGACACCACTACCCCGGCCAGCATGGCCGCGACCCTGCGCAAGCTGCTGACCAGCCAGCGTCTGAGCGCCCGTTCGCAACGGCAGCTGCTGCAGTGGATGGTGGACGATCGGGTCGCCGGACCGTTGATCCGCTCCGTGCTGCCGGCGGGCTGGTTTATCGCCGATAAGACCGGAGCTAGCAAGCGGGGTGCGCGCGGGATTGTCGCCCTGCTTGGCCCGAATAACAAAGCAGAGCGCATTGTGGTGATTTATCTGCGGGATACGCCGGCGAGCATGGCCGAGCGAAATCAGCAAATCGCCGGGATCGGCGCGGCGCTGATCGAGCACTGGCAACGCTAA

*blaCTX-M2*:

CTTTCCGCCTTCTGCTCCGGTTGGGTAAAGTAGGTCACCAGAACCAGCGGTGCGTGGTTTTCCGGCCAGATAACCGCGATATCGTTGGTGGTGCCATAATCTCCGCTGCCGGTTTTATCGCCCACTACCCATGATTTCGGCAGACCCGCCCGAATGCTCGCGCTACCGGTAGTATTGCCCTTAAGCCACGTCACCAACTGTGCCCGCTGAGTTTCCGCCAGCGCTTTACCCAGCGTCAGATTTTTCAGGGTCTGCGCCATCGCGAGCGGCGTGGTGGTATCACGCGGGTCGCCTGGAATGGCGGTATTGAGCGTGGGCTCGGTTCTGTCCAGACGGAAGGTCTCATCACCCAACGAGCGAGCAAACGCCGTCACTTTATCGGGACCACCCAGATGGGCAATCAGCTTATTCATGGCAGTATTGTCGCTATACTGCAGCGCCGCTGCGCCAAGCTCAGCCAGCGTCATCGTGCCGTTAACGTGTTTCTCCGCAATGGGATTGTAGTTAACCAGGTCGCTCTTCTTGATTTCAACGCGCTGATTTAGCAGGTGCTTATCGCTCTCGCTCTGTTTAAGCACCGCCGCGGCCGCCATCACCTTACTGGTACTGCACATCGCAAAACGTTCATCGGCACGGTAGAGAATCTGCGAATTATCGGCGGTGTTAATCAGCGCAACGCCAAGCCGACCTCCCGAACTTTTCTCCAGGGCTTCCAGCTGCTGTTGCACGCTGTTCGCCTGCGCATGCAGCGTTGCGCTGCTAAATAG

*blaCTX-M1*:

AAAACCTGGATTGCTCACGTTGGCGGCCCGGCTAGCGTCACCGCGTTCGCCCGACAGCTGGGAGACGAAACGTTCCGTCTCGACCGTACCGAGCCGACGTTAAACACCGCCATTCCGGGCGATCCGCGTGATACCACTTCACCTCGGGCAATGGCGCAAACTCTGCGGAATCTGACGCTGGGTAAAGCATTGGGCGACAGCCAACGGGCGCAGCTGGTGACATGGATGAAAGGCAATACCACCGGTGCAGCGAGCATTCAGGCTGGACTGCCTGCTTCCTGGGTTGTGGGGGATAAAACCGGCAGCGGTGACTATGGACCCAACCAACGAAA

*aac(6')-Ib-cr*:

ATGAGCAACGCAAAAACAAAGTTAGGCATCACAAAGTACAGCATCGTGACCAACAGCAACGATTCCGTCACACTGCGCCTCATGACTGAGCATGACCTTGCGATGCTCTATGAGTGGCTAAATCGATCTCATATCGTCGAGTGGTGGGGCGGAGAAGAAGCACGCCCGACACTTGCTGACGTACAGGAACAGTACTTGCCAAGCGTTTTAGCGCAAGAGTCCGTCACTCCATACATTGCAATGCTGAATGGAGAGCCGATTGGGTATGCCCAGTCGTACGTTGCTCTTGGAAGCGGGGACGGACGGTGGGAAGAAGAAACCGATCCAGGAGTACGCGGAATAGACCAGTTACTGGCGAATGCATCACAACTGGGCAAAGGCTTGGGAACCAAGCTGGTTCGAGCTCTGGTTGAGTTGCTGTTCAATGATCCCGAGGTCACCAAGATCCAAACGGACCCGTCGCCGAGCAACTTGCGAGCGATCCGATGCTACGAGAAAGCGGGGTTTGAGAGGCAAGGTACCGTAACCACCCCATATGGTCCAGCCGTGTACATGGTTCAAACACGCCAGGCATTCGAGCGAACACGCAGTGATGCCTAA

*rmtB*:

ATGAACATCAACGATGCCCTCACCTCCATCCTGGCCTCAAAAAAATACCGCGCCCTTTGCCCGGATACCGTGCGGCGCATCCTGACTGAGGAATGGGGGCGGCATAAATCCCCCAAACAGACCGTAGAGGCTGCACGCACCCGGCTGCATGGAATTTGCGGGGCATATGTCACCCCGGAATCGCTCAAGGCTGCTGCCGCCGCGCTTTCTGCGGGCGATGTAAAAAAGGCATTGTCGCTGCATGCCTCCACCAAGGAGCGACTGGCCGAGCTGGATACCCTGTACGATTTTATCTTTTCAGCCGAAACTCCCCGCCGCGTGCTGGATATCGCCTGCGGTCTTAACCCCTTGGCGCTATACGAGCGCGGCATTGCATCCGTGTGGGGCTGTGATATCCACCAGGGATTGGGGGATGTCATCACCCCCTTTGCTAGGGAAAAAGATTGGGATTTTACCTTTGCCCTGCAGGATGTGCTGTGTGCGCCGCCCGCCGAAGCCGGCGACCTGGCGCTGATTTTTAAGCTTTTGCCCCTGCTGGAGCGGGAGCAGGCCGGTTCTGCCATGGCACTTTTACAATCCCTCAATACCCCGCGCATGGCTGTCAGCTTTCCCACGCGTAGTTTAGGCGGGCGTGGAAAAGGCATGGAGGCGAACTACGCCGCATGGTTCGAGGGCGGCTTGCCCGCCGAGTTTGAGATTGAGGATAAAAAGACCATCGGAACAGAACTTATATACTTGATAAAAAAGAATGGATAA

*ant(3'')-I*:

TGCCAATATCGAACAAACCAGTTAACAAAACGCGGCACTCGGACGCCCTTGTCTCCGCTTCGCTGCGTCAAGGTCGCCGGTGCGCTCTGCGTTAAACATCATGAGGGAAGCGGTGATCGCCGAAGTATCGACTCAACTATCAGAGGTAGTTGGCGTCATCGAGCGCCATTTCGAACCGACGTTGCTGGCCGTACATTTGTACGGCTCCGCAGTGGATGGCGGCCTGAAGCCACACAGTGATATTGATTTGCTGGTTACGGTGACCGTAAGGCTTGATGAAACAACGCGGCGAGCTTTGATCAACGACCTTTTGGAAACTTCGGCTTCCCCTGGAGAGAGCGAGATTCTCCGCGCTGTAGAAGTCACCATTGTTGTGCACGACGACATCATTCCGTGGCGTTATCCAGCTAAGCGCGAACTGCAATTTGGAGAATGGCAGCGCAATGACATTCTTGCAGGTATCTTCGAGCCAGCCACGATCGACATTGATCTGGCTATCTTGCTGACAAAAGCAAGAGAACATAGCGTTGCCTTGGTAGGTCCAGCGGCGGAGGAACTCTTTGATCCGGTTCCTGAACAGGATCTATTTGAGGCGCTAAATGAAACCTTAACGCTATGGAACTCGCCGCCCGACTGGGCTGGCGATGAGCGAAATGTAGTGCTTACGTTGTCCCGCATTTGGTACAGCGCAGTAACCGGCAAAATCGCGCCGAAGGATGTCGCTGCCGACTGGGCAATGGAGCGCCTGCCGGCCCAGTATCAGCCCGTCATACTTGAAGCTAGACAGGCTTATCTTGGACAAGAAGAAGATCGCTTGGCCTCCCGCGCAGATCAGTTGGAAGAATTTGTTCACTACGTGAAAGGCGAGATCACCAAGGTAGTCGGCAAATAATGTCTAACAATTCGTTCAAGCCGACGCCGCTTCGCGGCGCGGCTTAACTCAAGCGTTAGATGCACTAAGCACATAATTGCTCACAGC

*armA*:

CATTAGTGGATGATAAGAGAGTGATGTCTACAAAGGTACTTATGATGTAGTATTCCTTTTAAAGATGCTTCCTGTGCTAAAACAGCAAGATGTAAATATCTTGGATTTCCTACAGCTTTTTCATACTCAAAACTTTGTAATATCTTTTCCAATAAAGTCTTTATCTGGAAAGGAGAAGGGAATGGA

*aac(6')-II*:

TACGCCGTGGGTCGATGTTTGATGTTATGGAGCAGCAACGATGTTACGCAGCAGGGCAGTCGCCCTAAAACAAAGTTAGGCAGCACGGAGACACTTCAGCATGCATCCCGGCGTTGTTACTCTGCGTCCGATGACCGAAGACGACATCGGTATGCTTCACGAATGGTTGAATCGGCCGCACATTGTCGAATGGTGGGGTGGTGAGCGGCCCTCGCTCGAAGAGGTGAAAGAGGACTATCGGCCCAGCGCGTTGGCCGAAGAAGGAGTGACGCCGTACATCGGTTTGCTTGACGGAACTCCATTCGCGTTCGCACAGTCGTACGTTGCGCTCGGGTCGGGTGGTGGATGGTGGGAGGAAGAGACCGATCCTGGTGTCCGCGGAATCGATCAATCAATCGCCGATTCCGGGCTTCTCGGAAGAGGTTACGGCACTCGGCTGGTGCAGGCGCTTGTTGATTTGCTGTTCGCCGACCCGCAGGTATCCAAGGTTCAGACGGACCCCTCCCCGAACAACATGCGCGCGATACGCTGCTATGAGAAGGCAGGCTTCCGGAAGGTCAAGGTCGTTTCAACACCGGATGGGCCGGCCATGTACATGTTGCACGAGCGTCCGTTGGTGAACGGTTTGCGCAGTGCGGCCTAACTTTTCGCTCCAACGGACGCTTGACCCGTCGGCCCGGCCGCTGCCGCAGCCGGACCGCCGCGTCAACCGCCGCTGACCTCCGGAGT

*aac(3')-II*:

ATGCATACGCGGAAGGCAATAACGGAGGCGCTTCAAAAACTCGGAGTCCAAACCGGTGACCTCTTGATGGTGCATGCCTCACTTAAAGCGATTGGTCCGGTCGAAGGAGGAGCGGAGACGGTCGTTGCCGCGTTACGCTCCGCGGTTGGGCCGACTGGCACTGTGATGGGATACGCGTCGTGGGACCGATCACCCTACGAGGAGACTCTGAATGGCGCTCGGCTGGATGACGAAGCCCGCCGTACCTGGCTGCCGTTCGATCCCGCAACAGCCGGGACTTACCGTGGGTTCGGCCTGCTGAATCAATTTCTGGTTCAAGCCCCCGGCGCGCGGCGCAGCGCGCACCCCGATGCATCGATGGTCGCGGTTGGTCCGCTGGCTGAAACGCTGACGGAGCCTCACGAACTCGGTCACGCCTTGGGGGAAGGATCGCCCGTCGAGCGGTTCGTTCGCCTTGGCGGGAAGGCCCTGCTGTTGGGTGCGCCGCTAAACTCCGTTACCGCATTGCACTACGCCGAGGCGGTTGCCGATATCCCCAACAAACGGTGGGTGACGTATGAGATGCCGATGCTTGGAAGAGACGGTGAAGTCGCCTGGAAAACGGCATCGGATTACGATTCAAACGGCATTCTCGATTGCTTTGCTATCGAAGGAAAGCCGGATGCGGTTGAAACTATAGCAAATGCTTACGTGAAGCTCGGTCGCCATCGAGAAGGTGTCGTGGGCTTTGCTCAGTGCTACCTGTTCGACGCGCAGGACATCGTGACGTTCGGCGTCACCTATCTTGAGAAGCATTTCGGAACCACTCCGATCGTGCCTCCGCACGAGGCCGTCGAGCGCTCTTGCGAGCCTTCCGGTTAG

*QnrS*:

ATGGAAACCTACAATCATACATATCGGCACCACAACTTTTCACATAAAGACTTAAGTGATCTCACCTTCACCGCTTGCACATTCATTCGCAGCGACTTTCGACGTGCTAACTTGCGTGATACGACATTCGTCAACTGCAAGTTCATTGAACAGGGTGATATCGAAGGCTGCCACTTTGATGTCGCAGATCTTCGTGATGCAAGTTTCCAACAATGCCAACTTGCGATGGCAAACTTCAGTAATGCCAATTGCTACGGTATAGAGTTCCGTGCGTGTGATTTAAAAGGTGCCAACTTTTCCCGAACAAACTTTGCCCATCAAGTGAGTAATCGTATGTACTTTTGCTCAGCATTTATTTCTGGATGTAATCTTTCCTATGCCAATATGGAGAGGGTTTGTTTAGAAAAATGTGAGTTGTTTGAAAATCGCTGGATAGGAACGAACCTAGCGGGTGCATCACTGAAAGAGTCAGACTTAAGTCGAGGTGTTTTTTCCGAAGATGTCTGGGGGCAATTTAGCCTACAGGGTGCCAATTTATGCCACGCCGAACTCGACGGTTTAGATCCCCGCAAAGTCGATACATCAGGTATCAAAATTGCAGCCTGGCAGCAAGAACTGATTCTCGAAGCACTGGGTATTGTTGTTTATCCTGACTAA

*QnrB*:

CAGGTGCCGACCTGAGCGGCACTGAATTTATCGGCTGTCAGTTCTATGATCGTGAAAGCCAGAAAGGGTGCAATTTTAGTCGTGCGATGCTGAAAGATGCCATTTTTAAAAGCTGTGATTTATCCATGGCGGATTTTCGCAATTCCAGTGCGCTGGGCATTGAAATTCGCCACTGCCGCGCACAAGGCGCAGATTTCCGCGGCGCAAGCTTTATGAATATGATCACCACGCGCACCTGGTTTTGTAGCGCATATATCACGAATACCAATCTAAGCTACGCCAATTTTTCGAAAGTCGTGTTGGAAAAGTGTGAGCTGTGGGAAAACCGTTGGATAGGTGCCCAGGTACTGGGCGCGACGTTCAGTGGTTCAGATCTCTCCGGCGGCGAGTTTTCGACTTTCGACTGGCGAGCAGCAAACTTCACACATTGCGATCTGACCAATTCGGAGTTGGGTGACTTAGATATTCGGGGCGTTGATTTACAAGGCGTTAAGTTGGACAACTAC

*QnrD*:

ATGGAAAAGCACTTTATCAATGAAAAGTTTTCACGGGATCAATTTACGGGGAATAGAGTTAAAAATATTGCCTTTTCAAATTGTGATTTTTCAGGGGTTGATTTAACTGATACTGAATTTGTTGATTGTAGCTTTTACGACAGGAATAGCCTGGTAGGGTGTGATTTTAATAGAGCCAAACTAAAAAACGCCAGCTTTAAAAGCTGCGATTTATCAATGAGTAATTTTAAAAACATTAGCGCCTTAGGTCTTGAGATTAGTGAGTGTTTAGCTCAAGGAGTTGATTTTCGAGGGGCTAATTTTATGAATATGATAACTACAAGGTCATGGTTTTGTAGTGCTTATATAACCAAGACAAATCTTAGTTACGCTAATTTTTCTAGAGTCATATTAGAAAAGTGCGAACTGTGGGAAAATCGCTGGAATGGCACTGTGATAACTGGCGCCGTGTTTCGTGGTTCCGATCTTTCTTGTGGGGAGTTTTCATCGTTTGATTGGTCTTTGGCTGATTTTACTGGTTGTGATTTAACGGGTGGGGTGCTTGGCGAGCTTGATGCAAGACGAACTAATTTAGATGGCGTGAAGTTGGATGGAGAGCAGGCGCTTCAGCTTGTTGAGAGTTTAGGTGTTATTGTTCACCGATAA

*QnrA*:

CTGCAAAGGTTGTTGGGAAGGCGCGAACCAACCCCATGTTTGCCTGCCTAGGCAAAGCTCGCCGAAAGAGTTAGCACCCTCCCTGATTAAAGGAAGCCGTATGGATATTATTGATAAAGTTTTTCAGCAAGAGGATTTCTCACGCCAGGATTTGAGTGACAGCCGTTTTCGCCGCTGCCGCTTTTATCAGTGTGACTTCAGCCACTGTCAGCTGCAGGATGCCAGTTTCGAGGATTGCAGTTTCATTGAAAGCGGCGCCGTTGAAGGGTGTCACTTCAGCTATGCCGATCTGCGCGATGCCAGTTTCAAGGCCTGCCGTCTGTCTTTGGCCAACTTCAGCGGTGCCAACTGCTTTGGCATAGAGTTCAGGGAGTGCGATCTCAAGGGCGCCAACTTTTCCCGGGCCCGCTTCTACAATCAAGTCAGCCATAAGATGTACTTCTGCTCGGCTTATATCTCAGGTTGCAACCTGGCCTATACCAACTTGAGTGGCCAATGCCTGGAAAAATGCGAGCTGTTTGAAAACAACTGGAGCAATGCCAATCTCAGCGGCGCTTCCTTGATGGGCTCAGATCTCAGCCGCGGCACCTTCTCCCGCGACTGTTGGCAACAGGTCAATCTGCGGGGCTGTGACCTAACCTTTGCCGATCTGGATGGGCTCGACCCCAGACGGGTCAACCTCGAAGGAGTCAAGATCTGTGCCTGGCAACAGGAGCAACTGCTGGAACCCTTGGGAGTAATAGTGCTGCCGGATTAGCTCTGGTTCTGAAATCCATCCCTGTCGGTGTTGCTTATGCAGTCTGGTCGGGACTCGGCGTCGTCATAATTACAGCCATTGCCTGGTTGCTTCAT

*QnrC*:

TTGAATTATTCCCATAAAACGTACGATCAAATTGATTTTTCCGGCCAAGATTTGAGCTCTCATCACTTTTCTCACTGTAAATTTTTTGGTTGTAATTTTAATCGAGTGAATTTACGTGATGCTAAATTCATGGGTTGTACATTTATTGAATCGAATGATTTTGAAGGATGTAATTTTATCTATGCAGACCTACGAGATGCTTCATTTATGAATTGCATGCTTTCAATGGCGAATTTCCAAGGGGCAAACTGTTTTGGCCTTGAATTGAGAGAATGCGATTTAAAAGGTGCTAATTTCTCACAGGCAAACTTTGTTAATCATGTTTCTAACAAAATGTATTTTTGCTCTGCTTACATTACGGGTTGTAATTTGTCTTATGCTAATTTCGATAAGCAATGCCTTGAAAAGTGTGATTTATTTGAAAATAAATGGGTAGGTGCAAGCCTGCAAGGGGCCTCTTTTAAAGAGTCAGACTTAAGTAGGGGATCATTTTCTGATGACTTTTGGGAGCAATGCAGAATTCAGGGGTGTGATCTCACTCATTCAGAATTAAATGGCTTAGAACCTCGTAAAGTGGATTTAACTGGCGTGAAAATTTGTTCATGGCAACAAGAGCAGCTTTTGGAGCAGTTGGGGGTGATTGTTATTCCAGACAAAGTGTTTTGA

*sul2*:

ATGAATAAATCGCTCATCATTTTCGGCATCGTCAACATAACCTCGGACAGTTTCTCCGATGGAGGCCGGTATCTGGCGCCAGACGCAGCCATTGCGCAGGCGCGTAAGCTGATGGCCGAGGGGGCAGATGTGATCGACCTCGGTCCGGCATCCAGCAATCCCGACGCCGCGCCTGTTTCGTCCGACACAGAAATCGCGCGTATCGCGCCGGTGCTGGACGCGCTCAAGGCAGATGGCATTCCCGTCTCGCTCGACAGTTATCAACCCGCGACGCAAGCCTATGCCTTGTCGCGTGGTGTGGCCTATCTCAATGATATTCGCGGTTTTCCAGACGCTGCGTTCTATCCGCAATTGGCGAAATCATCTGCCAAACTCGTCGTTATGCATTCGGTGCAAGACGGGCAGGCAGATCGGCGCGAGGCACCCGCTGGCGACATCATGGATCACATTGCGGCGTTCTTTGACGCGCGCATCGCGGCGCTGACGGGTGCCGGTATCAAACGCAACCGCCTTGTCCTTGATCCCGGCATGGGGTTTTTTCTGGGGGCTGCTCCCGAAACCTCGCTCTCGGTGCTGGCGCGGTTCGATGAATTGCGGCTGCGCTTCGATTTGCCGGTGCTTCTGTCTGTTTCGCGCAAATCCTTTCTGCGCGCGCTCACAGGCCGTGGTCCGGGGGATGTCGGGGCCGCGACACTCGCTGCAGAGCTTGCCGCCGCCGCAGGTGGAGCTGACTTCATCCGCACACACGAGCCGCGCCCCTTGCGCGACGGGCTGGCGGTATTGGCGGCGCTGAAAGAAACCGCAAGAATTCGTTAA

*sul1*:

ATGGTGACGGTGTTCGGCATTCTGAATCTCACCGAGGACTCCTTCTTCGATGAGAGCCGGCGGCTAGACCCCGCCGGCGCTGTCACCGCGGCGATCGAAATGCTGCGAGTCGGATCAGACGTCGTGGATGTCGGACCGGCCGCCAGCCATCCGGACGCGAGGCCTGTATCGCCGGCCGATGAGATCAGACGTATTGCGCCGCTCTTAGACGCCCTGTCCGATCAGATGCACCGTGTTTCAATCGACAGCTTCCAACCGGAAACCCAGCGCTATGCGCTCAAGCGCGGCGTGGGCTACCTGAACGATATCCAAGGATTTCCTGACCCTGCGCTCTATCCCGATATTGCTGAGGCGGACTGCAGGCTGGTGGTTATGCACTCAGCGCAGCGGGATGGCATCGCCACCCGCACCGGTCACCTTCGACCCGAAGACGCGCTCGACGAGATTGTGCGGTTCTTCGAGGCGCGGGTTTCCGCCTTGCGACGGAGCGGGGTCGCTGCCGACCGGCTCATCCTCGATCCGGGGATGGGATTTTTCTTGAGCCCCGCACCGGAAACAT
